# Supplementary material for: An efficient signal-on aptamer-based biosensor for adenosine triphosphate detection using graphene oxide both as an electrochemical and electrochemiluminescence signal indicator
Source: Royal Society of Chemistry journal article supplement (doi:10.1039/c5an00769k), 2015-01-01
Supplement: c5an00769k1.pdf [file c5an00769k1.pdf]

## Supplementary information

### **An efficient signal-on aptamer-based biosensor for adenosine triphosphate detection using graphene oxide as both electrochemical and Electrochemiluminescence signal indicator**

Xiang Huang,<sup>‡a</sup> Yuqin Li,<sup>‡b</sup> Xiaoshan Zhang,<sup>c</sup> Xin Zhang,<sup>a</sup> Yaowen Chen<sup>c</sup> and Wenhua Gao<sup>\*ac</sup>

<sup>a</sup> Department of Chemistry, Shantou University, Shantou, Guangdong 515063, P. R. China.

<sup>b</sup> Department of Pharmacy, Taishan Medicine College, Taian, Shandong 271016, P. R. China.

<sup>c</sup> Analysis & Testing Center, Shantou University, Shantou, Guangdong 515063, P. R. China.

\* *Corresponding author. Tel: +86-22-86502774; Fax: +86-22-82903941*

*E-mail address: [whgao@stu.edu.cn](mailto:whgao@stu.edu.cn)*

<sup>‡</sup> Both the authors contributed to the paper equally.

# Experimental Details

## Synthesis of the ECL probe

Ruthenium bis(2,2'-bipyridine)-(2,2'-bipyridine-4,4'-dicarboxylic acid)-N-hydroxysuccinimide ester [Ru(bpy)<sub>2</sub>(dcbpy)NHS] as the ECL label of luminescence signal reporter probe (Ru(bpy)<sub>2</sub>(dcbpy)NHS-ABA, abbreviated as Ru-ABA), was synthesized according to our previous experimental work with some modification.<sup>1</sup> Firstly, RuCl<sub>3</sub>·3H<sub>2</sub>O (0.78 g, 3.05 mM), 2,2'-bipyridine (0.936 g, 6 mM) and LiCl (0.84 g, providing a water-free reaction condition) were put together and under reflux in 60 mL of dimethylformamide (DMF) for 8 h with sustained stirring. Secondly, 50 mL acetone was added to the cooled reaction mixture and followed with an overnight freeze. The green-dark microcrystalline product was filtered through 0.2 μm membranes and washed with water-diethyl ether solution (V: V, 1: 3). The solid obtained as Ru(bpy)<sub>2</sub>Cl<sub>2</sub> was finally dried under vacuum 40 °C.

The synthesized Ru(bpy)<sub>2</sub>Cl<sub>2</sub> (0.0934 g, 0.1915 mM), NaHCO<sub>3</sub> (0.105 g) and 2,2'-bipyridine-4,4'-dicarboxylic acid (0.04678 g, 0.1917 mM) were added to 10 mL of water-methanol solution (V: V, 1: 4) and refluxed for 4 h. The solution was cooled in an ice bath for 7 h, meanwhile the mixing solution was adjusted to pH 4.4 with hydrochloric acid solution (HCl) to promote the formation of the orange-red crystal. The formed precipitate was filtrated through 0.2 μm membranes and dissolved with methanol and then filtrated once again to obtain orange-red clear filtrate. Then ~ 2 g NaPF<sub>6</sub> in 14 mL of water was added in the orange-red filtrate and cooled in an ice bath. And the latter formed precipitate was collected by filtration was Ru(bpy)<sub>2</sub>(dcbpy)(PF<sub>6</sub>)<sub>2</sub> and dried under vacuum 40 °C. Then, 0.153 g (0.74 mM) of N,N'-dicyclohexyl carbodiimide and 0.079 g (0.69 mM) of N-hydroxysuccinimide were dissolved in 1.5 mL DMF with stirring and cooled in an ice bath. And then 1 mL DMF containing 0.1322 g Ru(bpy)<sub>2</sub>(dcbpy)(PF<sub>6</sub>)<sub>2</sub> was added in the mixing solution and stirred for 5 h to obtain Ru(bpy)<sub>2</sub>(dcbpy)NHS. Ru(bpy)<sub>2</sub>(dcbpy)NHS was characterized in 0.1 M PBS solution (pH 7.4, 0.1 M NaCl + 0.1 M NaH<sub>2</sub>PO<sub>4</sub>/Na<sub>2</sub>HPO<sub>4</sub>) by UV-vis absorption spectrum and showed in Fig. S1.

The Ru(bpy)<sub>2</sub>(dcbpy)NHS-ABA (Ru-ABA) was synthesized according to our previous experimental work<sup>1</sup> with some modification. Firstly, 1 OD ss-TBA was dissolved in 200 μL water, and then 200 μL of 6.02 × 10<sup>-4</sup> M Ru(bpy)<sub>2</sub>(dcbpy)NHS inPBS (pH 7.4) was added to the above ss-ABA solution, allowed to shaking at low speed overnight at room temperature. Then, by addition of 100 μL of 3 M sodium acetate trihydrate (NaAc) and 2 mL of ethanol to the mixture, the precipitate reaction was carried out in refrigerator at -20 °C over 12 h. The mixture was immediately centrifuged in a micro-centrifuge at 12000 r/min for 30 min. The supernatant was carefully removed and the precipitate was rinsed with cold 70% ethanol twice and dried in air. The dried precipitate was redissolved in 200 μL of 0.1 M PBS (pH 7.4) and stored under - 20 °C in refrigerator. The resulting solution was used as a stock solution of the ECL probe Ru-ABA.

## Results and Discussion

### UV-vis absorption spectra of ECL probe

Figure S1 shows that the UV-vis absorption spectra of ATP-binding aptamer (ABA, curve a), Ru(bpy)<sub>2</sub>(dcbpy)NHS (curve b) and Ru(bpy)<sub>2</sub>(dcbpy)-NHS-ABA ((abbreviated as Ru-ABA, curve c). In Figure S1, the characteristic absorption peak at 260 nm is observed for the ABA (curve a). The absorption spectrum of the Ru(bpy)<sub>2</sub>(dcbpy)NHS (curve b) exhibits a characteristic peak at 457 nm, assigned to metal-to-ligand charge-transfer band and that at 287 nm, assigned to ligand-to-ligand charge-transfer of  $\pi \rightarrow \pi^*$  transitions. After the labeling of ABA with Ru(bpy)<sub>2</sub>(dcbpy)NHS, the absorption spectrum (curve c) shows both the ABA and the Ru(bpy)<sub>2</sub>(dcbpy)NHS characteristic absorption peaks. And the characteristic absorption peak appears at 457 nm, corresponding to the characteristic peak of Ru(bpy)<sub>2</sub>(dcbpy)NHS. The characteristic absorption peaks at 284 nm and 255 nm corresponding to the characteristic peaks of Ru(bpy)<sub>2</sub>(dcbpy)NHS at 287 nm and ABA at 260 nm, respectively. This indicates that Ru(bpy)<sub>2</sub>(dcbpy)NHS tag was attached to ABA successfully.

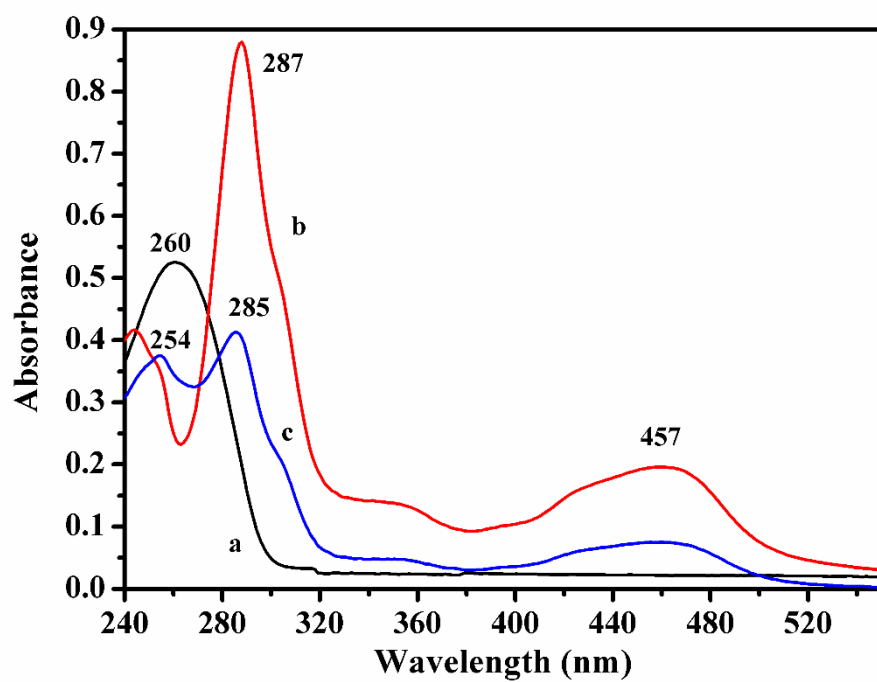

**Fig. S1** UV-vis absorption section of (a) ABA; (b)  $\text{Ru}(\text{bpy})_2(\text{dcbpy})\text{NHS}$ ; (c)  $\text{Ru}(\text{bpy})_2(\text{dcbpy})\text{NHS-ABA}$  in 0.1 M PBS (pH, 7.4).

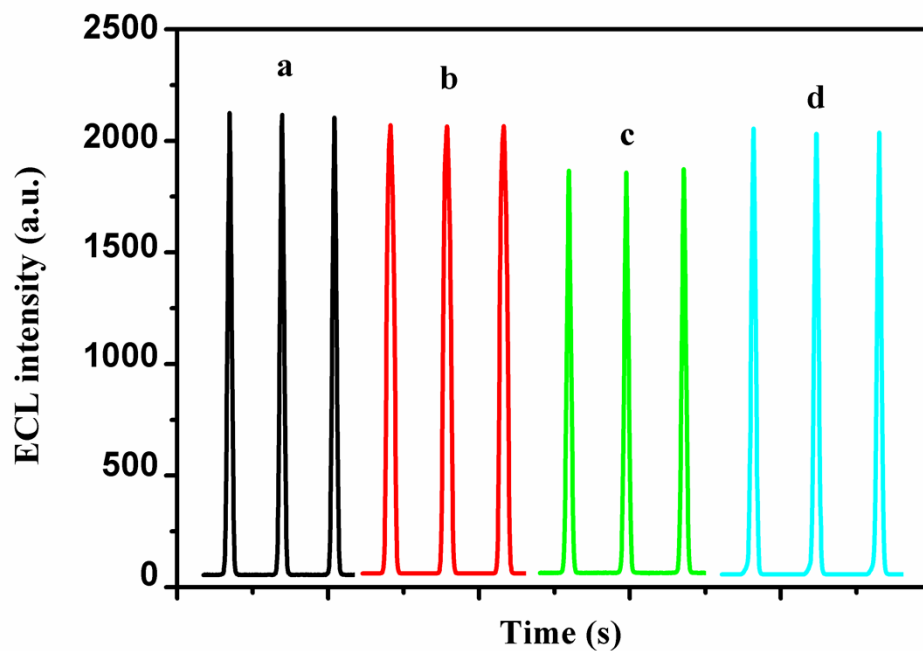

**Fig. S2** ECL response of ATP detection in human serum samples directly.

**Table S1**  
**Comparison of the sensitivity for different aptasensor assay methods**

| Analytical method      | Detection limit | Linearity range            | Reference |
|------------------------|-----------------|----------------------------|-----------|
| Electrochemical method | 13.6 nM         | 0.05 $\mu$ M – 1.0 $\mu$ M | 2         |
| Electrochemical method | 34 pM           | 0.1 nM -- 20 nM            | 3         |
| Electrochemical method | 6.7 pM          | 10 pM – 10 nM              | This work |
| Fluorescent            | 25 nM           | 50 nM – 20 $\mu$ M         | 4         |
| ECL                    | 7.6 nM          | 8.0 nM -- 2000 nM          | 5         |
| ECL                    | 31 pM           | 50 nM -- 100 pM            | 6         |
| ECL                    | 10 pM           | 10 pM--100 nM              | 7         |
| ECL                    | 6 nM            | 18 nM – 90.72 $\mu$ M      | 8         |
| ECL                    | 10 pM           | 50 pM--10 nM               | 9         |
| ECL                    | 4.8 pM          | 10 pM--10 nM               | This work |

**Table S2**  
**Determination results of ATP in human serum samples.**

| Sample No. <sup>a</sup> | Added (nM) | Found (nM) <sup>b</sup> | Recovery (%) | RSD (% , n=3) |
|-------------------------|------------|-------------------------|--------------|---------------|
| 1                       | 1.00       | 0.96                    | 96.0         | 4.18          |
| 2                       | 2.00       | 2.15                    | 107.5        | 5.04          |
| 3                       | 5.00       | 4.97                    | 99.4         | 6.12          |
| 4                       | 10.00      | 10.42                   | 104.2        | 5.64          |

a. All human serum samples were diluted 10-fold with buffer solution (pH 7.4) prior to assay.

b. Each data was given as average value obtained from three successive determinations.

**Table S3**  
**Analysis of ATP in human serum samples using the proposed aptasensor directly.<sup>a</sup>**

| Samples No. | ECL<br>(n=3, $\bar{X} \pm \text{SD}$ ) | Log (ATP)<br>(n=3, $\bar{X} \pm \text{SD}$ ) | ATP levels (nM)<br>(n=3, $\bar{X} \pm \text{SD}$ ) |
|-------------|----------------------------------------|----------------------------------------------|----------------------------------------------------|
| a           | 2000 $\pm$ 70.5                        | -0.51 $\pm$ 0.010                            | 0.31 $\pm$ 0.01                                    |
| b           | 2100 $\pm$ 80.7                        | -0.42 $\pm$ 0.036                            | 0.38 $\pm$ 0.03                                    |
| c           | 1980 $\pm$ 80.4                        | -0.54 $\pm$ 0.053                            | 0.29 $\pm$ 0.03                                    |
| d           | 2057 $\pm$ 100.8                       | -0.46 $\pm$ 0.020                            | 0.35 $\pm$ 0.01                                    |

a. All values were obtained as average of three repetitive determinations plus standard deviation.

## Reference

1. W. H. Gao, A. Zhang, Y. S. Chen, Z. X. Chen, Y. W. Chen, F. S. Lu and Z. G. Chen, *Biosens. Bioelectron.*, 2013, 49, 139-145.
2. L. Feng, Z. Zhang, J. Ren, and Qu, X, *Biosens. Bioelectron.*, 2014, 62, 52-58.
3. T. Bao, H. Shu, W. Wen, X. Zhang and Wang, S. *Anal Chim Acta.*, 2014, **863**, 64-69.
4. F Li, Z. Du, L. Yang, and Tang, B. *Biosens. Bioelectron.*, 2013, **41**, 907-910.
5. Y. Liu, J. Lei, Y. Huang and H. Ju, *Anal. Chem.*, 2014, **86**, 8735-8741.
6. L. Chen, Q. Cai, F. Luo, X. Chen, X. Zhu, B. Qiu and G. Chen, *Chem. Commun.*, 2010, **46**, 7751-7753.
7. X. Zhou, R. Duan, and D. Xing, *Analyst.*, 2012, **137**, 1963-1969.
8. H. Huang, Y. Tan, J. Shi, G. Liang and J. J Zhu, *Nanoscale.*, 2010, **2**, 606-612.
9. H. Chen, Q. Chen, Y. Zhao, F. Zhang, F. Yang, J. Tang and P He, *Talanta.*, 2014, **121**, 229-233.
